# Supplementary material for: Dependence of electron recombination time and light to electricity conversion efficiency on shape of the nanocrystal light sensitizer
Source: Royal Society of Chemistry journal article supplement (doi:10.1039/c3ee00120b), 2013-01-01
Supplement: c3ee00120b.pdf [file c3ee00120b.pdf]

*Supporting Information for*

**Dependence of electron recombination time and light to electricity conversion efficiency on shape of nanocrystal light sensitizer**

Sayantana Mazumdar<sup>a</sup> and Aninda J. Bhattacharyya<sup>\*a</sup>

<sup>a</sup> *Solid State and Structural Chemistry Unit, Indian Institute of Science, Bangalore-560012, India. Fax: +91 80 23601310; Tel: +91 80 22932616; E-mail: aninda\_jb@sscu.iisc.ernet.in*

*Materials and Methods*

*Synthesis of CdS nanocrystals with various shapes:* Cadmium acetate,  $\text{Cd}(\text{CH}_3\text{COO})_2 \cdot 2\text{H}_2\text{O}$  and thioacetamide,  $\text{CH}_3\text{CSNH}_2$  have been taken in 7:10 ratio in a 50 ml Teflon container. Solvent mixtures (structure directing agents) with various ratios of ethylene glycol (EG) and ethylenediamine (EN) have been added to it while kept in an ice-bath and has been stirred for few minutes. They are then kept in stainless steel autoclaves and the reaction was then carried out at  $180^\circ\text{C}$ , 4 hours. Later the product was collected by centrifugation, washed by water and ethanol for several times and dried at  $70^\circ\text{C}$  in vacuum to get yellow powders which were subjected to further characterization and experiments.

*Preparation of  $\text{TiO}_2$  layers:* TTIP (Titanium tetra-isopropoxide) has been dissolved in slightly acidic iso-propanol-water mixture and it's been stirred for 24 hours resulting in a clear solution. FTO-glasses has been dipped in it and heated at  $120^\circ\text{C}$  to get a transparent and compact layer of  $\text{TiO}_2$ . TTIP added in 6 N HCl soln. and stirred for 30 minutes in a ice-bath. Then 15 ml of it has been put in a Teflon container along with the FTO-glasses with compact layer and a hydrothermal reaction has been carried out in autoclave at  $150^\circ\text{C}$  for 4 hours to grow vertically aligned  $\text{TiO}_2$ - nanorods on the FTO-glasses. Again, it has been put in a 0.4 N  $\text{TiCl}_4$  solution at  $100^\circ\text{C}$  for an hour to get a scattering layer of  $\text{TiO}_2$ . After that the electrodes have been annealed at  $450^\circ\text{C}$  for an hour resulting a composite  $\text{TiO}_2$  film with  $\sim 15\mu\text{m}$  thickness.

*Sensitization:* The electrodes have been put in a solution of Thioglycolic acid (TGA) in acetonitrile which acts as a linker molecule for 12 hours to attach the CdS nanocrystals with  $\text{TiO}_2$ . After that they have been immersed in dispersions of various CdS nanopowders in toluene for 48 hours. The CdS- $\text{TiO}_2$  was additionally co-sensitized by cadmium selenide (CdSe) nanoparticles to shift absorption onset towards longer wavelengths<sup>8</sup> and by zinc sulfide ( $\text{ZnS}$ )<sup>3</sup> for optimization of the trap states. Both CdSe and ZnS were coated using SILAR method. In brief, the electrodes were dipped in a 0.03 M cadmium nitrate solution ( $\text{Cd}^{2+}$  source) and a 0.03 M selenium di-oxide solution with 0.06 M sodium borohydride ( $\text{Se}^{2-}$  source) in cycle, 30s cycles in each cases, total 6 cycles. It's been carried out in Nitrogen-atmosphere. Both solutions were in ethanol and in the second solution, sodium borohydride reduced selenium dioxide to produce selenide-ion. ZnS coating has also been done by SILAR where 0.2 M zinc acetate and 0.2 M sodium sulphide, both in aqueous solution have been served as the  $\text{Zn}^{2+}$  and  $\text{S}^{2-}$  sources respectively. 2 cycles of 1 minute each have been carried out.

*Solar Cell Fabrication:* Scotch-tape (thickness  $\sim 50 \mu\text{m}$ ) has been put on the sides of the photoanode which acted as the spacer. A drop of sodium polysulphide electrolyte (1 M  $\text{Na}_2\text{S}$ , 1 M S) was used as the electrolyte and  $\text{Cu}_2\text{S}$  electrode obtained from a piece of brass has been served as the dark cathode. A sandwich type cell has been made of typically 5 mm X 5 mm of active area and further characterizations have been carried out.

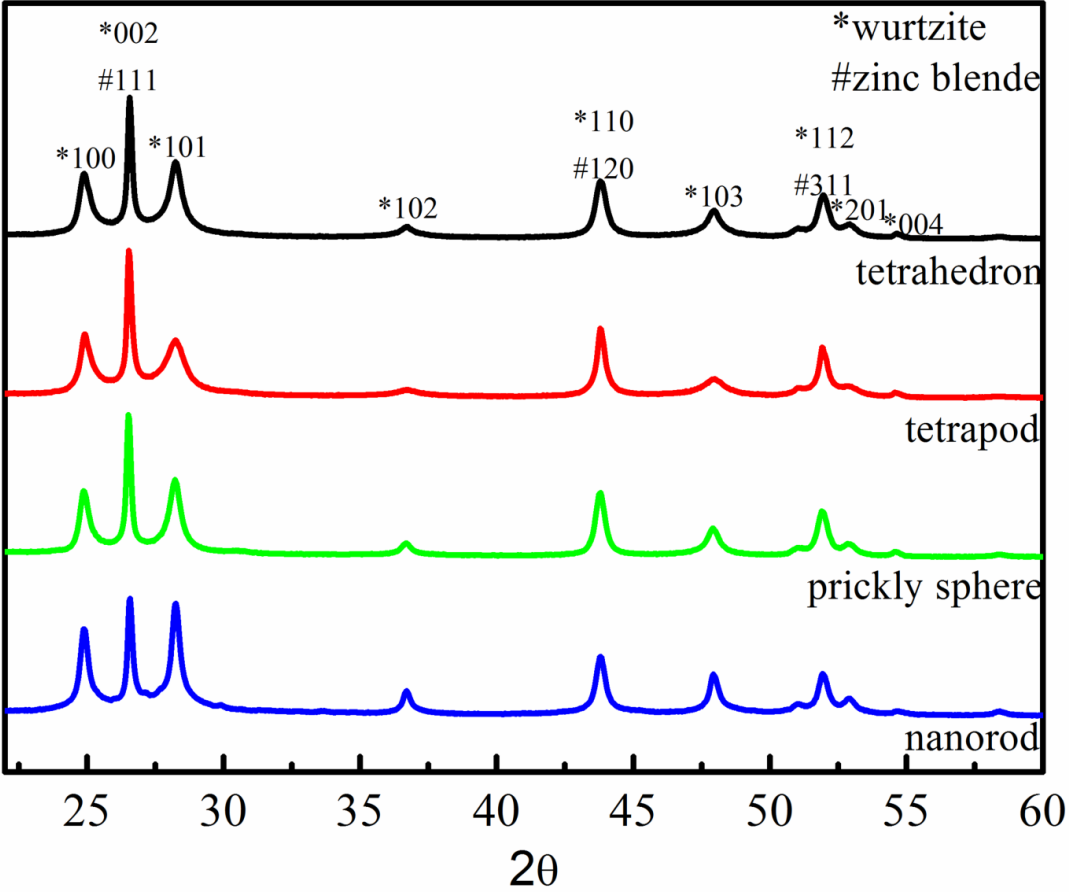

Figure S1: Powder XRD patterns of CdS samples with different morphologies

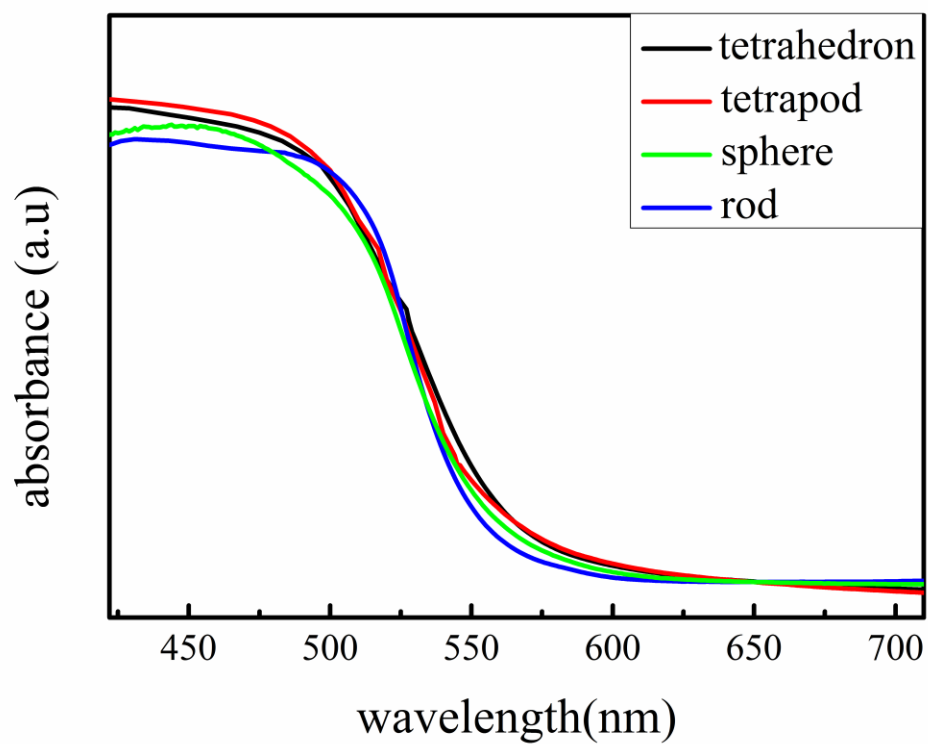

Figure S2: UV-Vis spectra for CdS powder samples of different shapes.

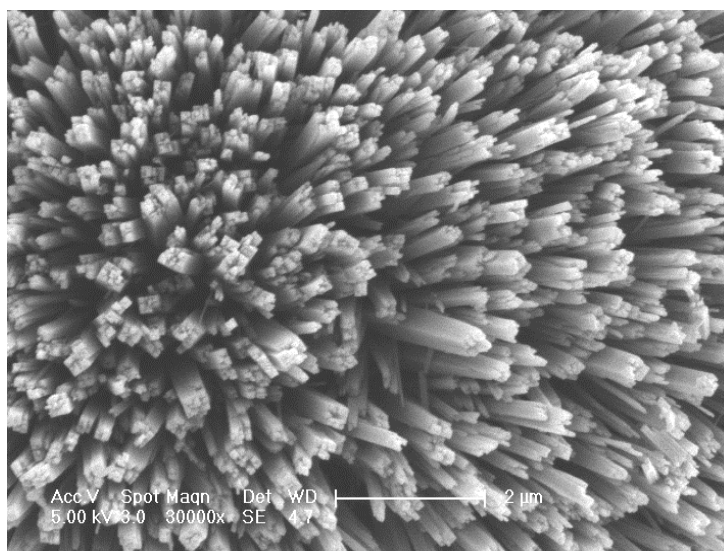

Figure S3: SEM micrograph of as-synthesized TiO<sub>2</sub> nanorod (absorption layer) vertically aligned on FTO substrate coated with a compact and transparent layer of TiO<sub>2</sub>.

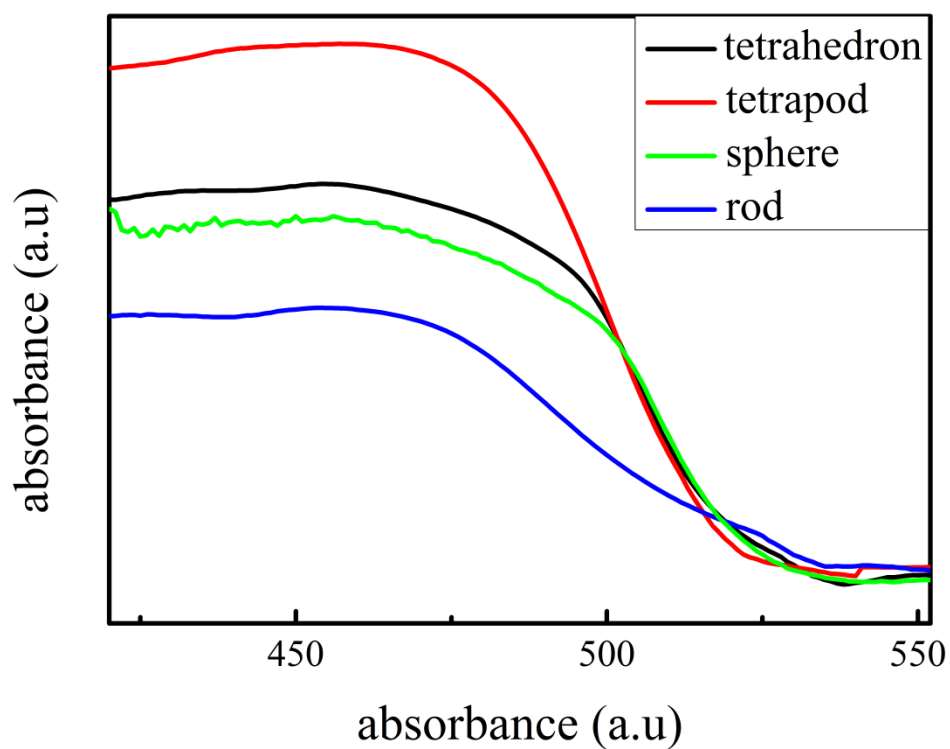

Figure S4: UV-Vis spectra of photoanodes with TiO<sub>2</sub> sensitized by various shapes of CdS

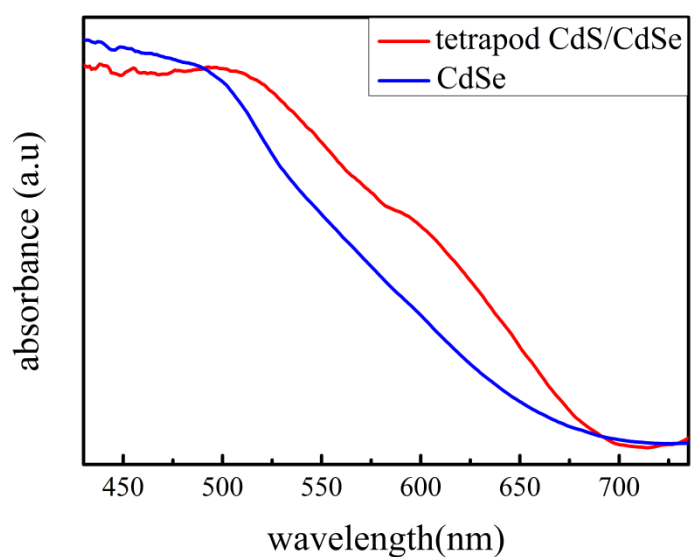

Figure S5: UV-Vis spectra of photoanodes with TiO<sub>2</sub> sensitized by CdSe (SILAR) and tetrapod-CdS(linker assisted)

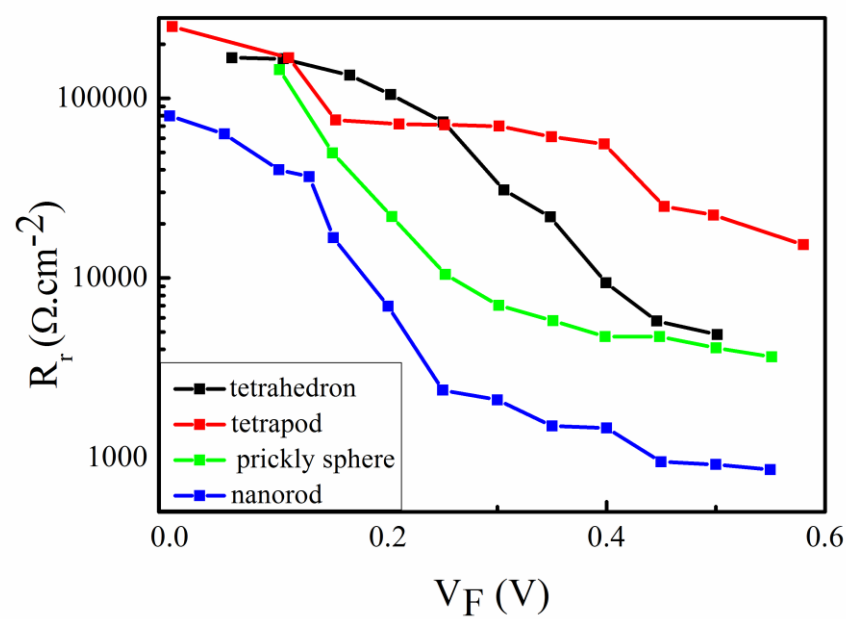

Figure S6: Recombination resistances of solar cells sensitized by various shapes of CdS  
(only)
